# Supplementary material for: Influence of Ultrasonic and Chemical Pretreatments on Quality Attributes of Dried Pepper (Capsicum annuum)
Source: MDPI journal article supplement (doi:10.3390/foods12132468), 2023-06-23
Supplement: s1 [file s1]

# Influence of Ultrasonic and Chemical Pretreatments on Quality Attributes of Dried Pepper (*Capsicum annuum*)

Milica Lučić <sup>1</sup>, Nebojša Potkonjak <sup>2,\*</sup>, Ivana Sredović Ignjatović <sup>3</sup>, Steva Lević <sup>3</sup>, Zora Dajić-Stevanović <sup>3</sup>, Stefan Kolašinac <sup>3</sup>, Miona Belović <sup>4</sup>, Aleksandra Torbica <sup>4</sup>, Ivan Zlatanović <sup>5</sup>, Vladimir Pavlović <sup>3</sup> and Antonije Onjia <sup>6,\*</sup>

<sup>1</sup> Innovation Center of the Faculty of Technology and Metallurgy, Karnegijeva 4, 11120 Belgrade, Serbia

<sup>2</sup> Vinča Institute of Nuclear Sciences—National Institute of Republic of Serbia, University of Belgrade, Mike Petrovića Alasa 12-14, 11351, Vinča, Belgrade, Serbia

<sup>3</sup> Faculty of Agriculture, University of Belgrade, Nemanjina 6, 11080 Belgrade, Serbia

<sup>4</sup> Institute of Food Technology, University of Novi Sad, Bulevar Cara Lazara 1, 21000 Novi Sad, Serbia

<sup>5</sup> Faculty of Mechanical Engineering, University of Belgrade, Kraljice Marije 16, 11120 Belgrade, Serbia

<sup>6</sup> Faculty of Technology and Metallurgy, University of Belgrade, Karnegijeva 4, 11120 Belgrade, Serbia

\* Correspondence: npotkonjak@vin.bg.ac.rs (N.P.); onjia@tmf.bg.ac.rs (A.O.)

## Supplementary Material S1

Although none of the examined parameters have a statistically significant influence on TCC, it is observed the certain impact of (1) interaction between the drying method and mass-to-volume ratio; (2) drying method; (3) interaction between drying method and additive; (4) mass to volume ratio. Generally, tunnel hot air-drying more negatively affected TCC compared to freeze-drying. This finding is consistent with Kaur et al. (2020) [59], who observed more losses of carotenoids at 60 °C compared to lower drying temperatures. Treatments from the design lead to both a reduction and an increase in TCC compared to controls (HD and FD controls) produced from WB pepper. The change in TCC ranged from -38.67% to +18.30% in HD samples and from -39.42% to +5.03% in FD samples. The highest retention of TCC was in the FD sample with the following pretreatment: pH=10; CA; ultrasonic applied; T=20 °C; t=1 min and mass 30 g in 1 L. For the HD sample, the best TCC retention was obtained for pretreatment with pH=6.5; CA/KMS; ultrasonic applied; T=50 °C; t=3min and mass 100 g in 1 L. The positive impact of CA/NaMS (citric acid/sodium metabisulfite) on TCC was also observed by Bechoff et al. [60].

**Table S1.** Experimental values for the fractional factorial design (FFD) and results obtained for all the independent variables.

1

| No. | Drying Method | pH  | Additive | Ultrasonic power | T (°C) | t (min) | Mass (g) | Moisture content (%) | TPC mg/g GAE | DPPH  | L*    | a*    | b*    | C*    | h*    | TCC µg/g | NBI    | FRAP  | Skin puncture force (g) | RR     |
|-----|---------------|-----|----------|------------------|--------|---------|----------|----------------------|--------------|-------|-------|-------|-------|-------|-------|----------|--------|-------|-------------------------|--------|
| 1   | FD            | 3   | KMS      | ON               | 20     | 1       | 170      | 5.22                 | 8.69         | 44.67 | 47.90 | 31.31 | 32.08 | 44.83 | 45.69 | 3428     | 0.4487 | 65.23 | 157.33                  | 6.0256 |
| 2   | HD            | 6.5 | CA/ KMS  | OFF              | 50     | 3       | 100      | 8.12                 | 9.40         | 40.58 | 43.17 | 27.21 | 26.54 | 38.00 | 44.29 | 3303     | 0.9313 | 52.75 | 83.60                   | 7.2103 |
| 3   | HD            | 6.5 | CA/ KMS  | ON               | 50     | 3       | 100      | 8.77                 | 8.74         | 36.93 | 42.61 | 27.59 | 24.11 | 36.63 | 41.15 | 4046     | 0.5279 | 52.63 | 208.30                  | 6.1286 |
| 4   | HD            | 10  | KMS      | OFF              | 20     | 1       | 170      | 10.22                | 11.33        | 49.48 | 45.08 | 28.80 | 27.92 | 40.10 | 44.11 | 4365     | 0.6453 | 58.46 | 190.67                  | 7.0100 |
| 5   | FD            | 10  | CA       | OFF              | 20     | 5       | 170      | 7.90                 | 10.09        | 40.07 | 44.97 | 31.87 | 29.40 | 43.36 | 42.70 | 4363     | 0.6986 | 66.31 | 205.08                  | 5.9075 |
| 6   | FD            | 6.5 | CA/ KMS  | ON               | 50     | 3       | 100      | 7.68                 | 8.87         | 42.07 | 43.85 | 31.84 | 27.99 | 42.39 | 41.32 | 5472     | 0.4164 | 67.41 | 185.92                  | 5.8904 |
| 7   | HD            | 3   | KMS      | OFF              | 80     | 5       | 170      | 6.22                 | 9.44         | 42.13 | 43.07 | 30.85 | 27.58 | 41.38 | 41.79 | 4816     | 0.3953 | 53.38 | 250.92                  | 5.7331 |
| 8   | HD            | 6.5 | CA/ KMS  | ON               | 50     | 3       | 100      | 7.76                 | 10.41        | 45.84 | 40.89 | 30.64 | 25.65 | 39.96 | 39.93 | 584      | 0.9055 | 65.22 | 219.36                  | 5.7814 |
| 9   | FD            | 10  | KMS      | OFF              | 80     | 1       | 30       | 6.59                 | 8.71         | 28.69 | 43.16 | 33.89 | 30.35 | 45.49 | 41.85 | 5484     | 0.5279 | 50.56 | 238.34                  | 5.6819 |
| 10  | FD            | 6.5 | CA/ KMS  | ON               | 50     | 3       | 100      | 6.94                 | 11.37        | 40.81 | 43.20 | 31.92 | 30.85 | 44.39 | 44.02 | 4068     | 0.7663 | 68.21 | 134.95                  | 5.3787 |
| 11  | FD            | 6.5 | CA/ KMS  | OFF              | 50     | 3       | 100      | 9.14                 | 8.68         | 33.63 | 48.91 | 30.84 | 31.96 | 44.41 | 46.02 | 4099     | 0.7245 | 62.07 | 167.44                  | 6.8664 |
| 12  | FD            | 3   | CA       | OFF              | 80     | 1       | 170      | 4.04                 | 7.16         | 27.06 | 47.04 | 29.44 | 32.96 | 44.19 | 48.23 | 3925     | 0.6629 | 40.40 | 159.46                  | 5.8043 |
| 13  | FD            | 10  | CA       | ON               | 20     | 1       | 30       | 4.16                 | 9.35         | 43.11 | 44.60 | 31.95 | 30.98 | 44.51 | 44.12 | 5943     | 0.4030 | 60.85 | 187.40                  | 3.7370 |
| 14  | HD            | 10  | CA       | ON               | 80     | 1       | 170      | 4.28                 | 7.94         | 16.03 | 45.67 | 27.95 | 31.61 | 42.19 | 48.51 | 3179     | 0.5123 | 40.07 | 257.18                  | 5.2077 |
| 15  | FD            | 3   | CA       | ON               | 80     | 5       | 30       | 7.39                 | 8.09         | 29.09 | 48.26 | 36.95 | 36.22 | 51.75 | 44.43 | 5093     | 1.1605 | 50.15 | 116.97                  | 5.2348 |
| 16  | FD            | 3   | KMS      | OFF              | 20     | 5       | 30       | 3.70                 | 8.96         | 36.91 | 48.49 | 33.36 | 33.09 | 46.98 | 44.77 | 4732     | 0.6702 | 69.47 | 108.04                  | 5.7237 |
| 17  | HD            | 6.5 | CA/ KMS  | OFF              | 50     | 3       | 100      | 3.45                 | 9.63         | 33.41 | 43.79 | 30.14 | 29.70 | 42.31 | 44.58 | 4919     | 0.9998 | 62.14 | 179.60                  | 5.4375 |
| 18  | FD            | 6.5 | CA/ KMS  | OFF              | 50     | 3       | 100      | 6.94                 | 8.71         | 41.44 | 49.54 | 32.27 | 33.87 | 46.78 | 46.36 | 4084     | 0.7526 | 62.15 | 168.95                  | 5.6108 |
| 19  | FD            | 6.5 | CA/ KMS  | ON               | 50     | 3       | 100      | 7.31                 | 10.12        | 37.25 | 43.52 | 31.88 | 29.42 | 43.39 | 42.67 | 4770     | 0.5913 | 68.34 | 160.43                  | 5.6345 |
| 20  | FD            | 10  | KMS      | ON               | 80     | 5       | 170      | 3.11                 | 7.04         | 33.24 | 48.80 | 33.18 | 33.45 | 47.11 | 45.23 | 4515     | 0.5902 | 57.36 | 222.55                  | 5.4940 |
| 21  | HD            | 3   | KMS      | ON               | 80     | 1       | 30       | 4.24                 | 9.00         | 26.06 | 44.33 | 29.45 | 29.85 | 41.94 | 45.38 | 3831     | 0.5193 | 51.52 | 153.02                  | 5.2249 |
| 22  | FD            | 6.5 | CA/ KMS  | OFF              | 50     | 3       | 100      | 4.75                 | 8.73         | 40.88 | 50.17 | 33.71 | 35.78 | 49.16 | 46.71 | 4069     | 0.7803 | 62.24 | 170.47                  | 4.3552 |
| 23  | HD            | 10  | KMS      | ON               | 20     | 5       | 30       | 6.46                 | 10.32        | 33.92 | 46.86 | 30.23 | 32.04 | 44.05 | 46.67 | 3470     | 0.6790 | 64.84 | 161.80                  | 6.0290 |
| 24  | HD            | 3   | CA       | ON               | 20     | 5       | 170      | 11.06                | 12.26        | 23.38 | 45.91 | 31.30 | 34.02 | 46.22 | 47.38 | 3028     | 0.8317 | 57.91 | 182.93                  | 7.1410 |
| 25  | HD            | 10  | CA       | OFF              | 80     | 5       | 30       | 5.41                 | 11.14        | 24.82 | 47.19 | 31.88 | 33.37 | 46.15 | 46.30 | 3737     | 0.9791 | 71.33 | 257.16                  | 6.3561 |
| 26  | HD            | 3   | CA       | OFF              | 20     | 1       | 30       | 6.68                 | 7.52         | 15.82 | 45.16 | 30.81 | 32.40 | 44.72 | 46.44 | 3313     | 0.4641 | 43.43 | 214.92                  | 6.4187 |
| 27  | HD            | 6.5 | CA/ KMS  | OFF              | 50     | 3       | 100      | 10.07                | 14.06        | 27.57 | 48.21 | 33.28 | 35.46 | 48.63 | 46.82 | 4129     | 0.5708 | 79.13 | 153.80                  | 6.2203 |
| 28  | HD            | 6.5 | CA/ KMS  | ON               | 50     | 3       | 100      | 5.62                 | 12.48        | 62.85 | 40.89 | 30.64 | 25.65 | 39.96 | 39.93 | 5339     | 0.7231 | 80.55 | 147.72                  | 5.4539 |

2

**Table S2.** Alias Structure for 1/8 FFD, 7 factors, 28 runs, resolution IV.

| Alias Structure                                    |  |  |  |  |  |  |  |  |  |  |  |  |  |  |  |
|----------------------------------------------------|--|--|--|--|--|--|--|--|--|--|--|--|--|--|--|
| I + ABCE + ABFG + ACDG + ADEF + BCDF + BDEG + CEFG |  |  |  |  |  |  |  |  |  |  |  |  |  |  |  |
| A + BCE + BFG + CDG + DEF + ABCDF + ABDEG + ACEFG  |  |  |  |  |  |  |  |  |  |  |  |  |  |  |  |
| B + ACE + AFG + CDF + DEG + ABCDG + ABDEF + BCEFG  |  |  |  |  |  |  |  |  |  |  |  |  |  |  |  |
| C + ABE + ADG + BDF + EFG + ABCFG + ACDEF + BCDEG  |  |  |  |  |  |  |  |  |  |  |  |  |  |  |  |
| D + ACG + AEF + BCF + BEG + ABCDE + ABDGF + CDEFG  |  |  |  |  |  |  |  |  |  |  |  |  |  |  |  |
| E + ABC + ADF + BDG + CFG + ABEFG + ACDEG + BCDEF  |  |  |  |  |  |  |  |  |  |  |  |  |  |  |  |
| F + ABG + ADE + BCD + CEG + ABCEF + ACDFG + BDEFG  |  |  |  |  |  |  |  |  |  |  |  |  |  |  |  |
| G + ABF + ACD + BDE + CEF + ABCEG + ADEFG + BCDFG  |  |  |  |  |  |  |  |  |  |  |  |  |  |  |  |
| AB + CE + FG + ACDG + ADEG + BCDG + BDEF + ABCEFG  |  |  |  |  |  |  |  |  |  |  |  |  |  |  |  |
| AC + BE + DG + ABDF + ACFG + BCFG + CDEF + ABCDEG  |  |  |  |  |  |  |  |  |  |  |  |  |  |  |  |
| AD + CG + EF + ABCF + ABEG + BCDE + BDFG + ACDEFG  |  |  |  |  |  |  |  |  |  |  |  |  |  |  |  |
| AE + BC + DF + ABDG + ACFG + BEFG + CDEG + ABCDEF  |  |  |  |  |  |  |  |  |  |  |  |  |  |  |  |
| AF + BG + DE + ABCD + ACEG + BCEF + CDFG + ABDEFG  |  |  |  |  |  |  |  |  |  |  |  |  |  |  |  |
| AG + BF + CD + ABDE + ACEF + BCEG + DEFG + ABCDFG  |  |  |  |  |  |  |  |  |  |  |  |  |  |  |  |
| BD + CF + EG + ABCG + ABEF + ACDE + ADFG + BCDEFG  |  |  |  |  |  |  |  |  |  |  |  |  |  |  |  |
| ABD + ACF + AEG + BCG + BEF + CDE + DFG + ABCDEFG  |  |  |  |  |  |  |  |  |  |  |  |  |  |  |  |

Terms A, B, C, D, E, F, and G denotes effects of analyzed factors on responses, i.e. A – effect of drying method; B – effect of pH values of pretreatment solution; C – effect of applied additive; D – effect of ultrasound pretreatment; E – effect of pretreatment temperature, °C; F – effect of pretreatment time, min; and G – effect of sample mass (g) that is treated during a pretreatment. Design Generators: E = ABC; F = BCD; G = ACD.

**Table S3.** Main and interaction effects for each of the independent variables.

| TPC                 | A* | BD | E  | F  | AF | ABD | AG  | B   | AD  | AC  | AE  | G   | D  | AB | C   |
|---------------------|----|----|----|----|----|-----|-----|-----|-----|-----|-----|-----|----|----|-----|
| TCC                 | AG | A  | AC | G  | AB | B   | C   | D   | E   | AD  | ABD | AE  | BD | AF | F   |
| DPPH                | C  | AC | E  | G  | AE | A   | D   | B   | AG  | AF  | BD  | ABD | F  | AB | AD  |
| FRAP                | F* | E  | AE | BD | C  | B   | ABD | AF  | AD  | G   | AG  | AB  | A  | D  | AC  |
| L*                  | A  | AB | D  | F  | AC | AG  | ABD | AF  | AE  | B   | BD  | AD  | E  | C  | G   |
| a*                  | A* | F* | G  | BD | AG | AD  | AE  | ABD | AC  | E   | B   | AB  | AF | D  | C   |
| b*                  | A  | C  | AC | D  | AE | AB  | F   | G   | B   | ABD | AG  | E   | AD | BD | AF  |
| C*                  | A* | F  | G  | AC | AE | C   | D   | B   | AD  | AB  | E   | BD  | AG | AF | ABD |
| h*                  | AB | C  | D  | AG | AC | BD  | ABD | AE  | F   | B   | G   | AD  | A  | AF | E   |
| NBI                 | F* | BD | AB | C  | AE | G   | D   | E   | ABD | A   | AF  | AC  | B  | AD | AG  |
| Skin puncture force | B* | E  | AB | AC | A  | G   | ABD | AF  | C   | AE  | BD  | F   | D  | AD | AG  |
| RR                  | A  | AE | D  | BD | G  | AC  | E   | F   | AB  | B   | AG  | C   | AD | AF | ABD |

Terms A, B, C, D, E, F, and G denotes effects of analyzed factors on responses, i.e. A – effect of drying method; B – effect of pH values of pretreatment solution; C – effect of applied additive; D – effect of ultrasound pretreatment; E – effect of pretreatment temperature, °C; F – effect of pretreatment time, min; and G – effect of sample mass (g) that is treated during a pretreatment. The effect of interactions between two or three factors is denoted with two or three capital letters. The effects are ranked according to their impact on the examined variable, from the largest to the smallest. Statistically significant effects ( $\alpha=0.05$ ) have \* in subscript.

**Table S4.** Results for control pepper samples g/kg dry basis.

| Control | Pretreatment          | Drying method | DPPH <sup>a</sup> | FRAP <sup>a</sup> | TPC <sup>b</sup> | TCC       |
|---------|-----------------------|---------------|-------------------|-------------------|------------------|-----------|
| X1a     | -                     | HD            | 7.53±0.80         | 16.3±1.57         | 11.6±1.46        | 3.84±0.42 |
| X1b     | -                     | FD            | 6.51±1.22         | 13.2±1.93         | 8.46±1.31        | 5.86±0.21 |
| X2a     | Blanched <sup>#</sup> | HD            | 5.66±0.43         | 9.66±0.03         | 7.35±0.39        | 4.91±0.33 |
| X2b     | Blanched <sup>#</sup> | FD            | 9.21±0.31         | 13.4 ±0.03        | 8.96±0.58        | 5.60±0.47 |

<sup>#</sup>water blanched at 80 °C, 3 minutes; <sup>a</sup> - Trolox equivalent g/kg; <sup>b</sup> - GAE equivalent g/kg, GAE –gallic acid.

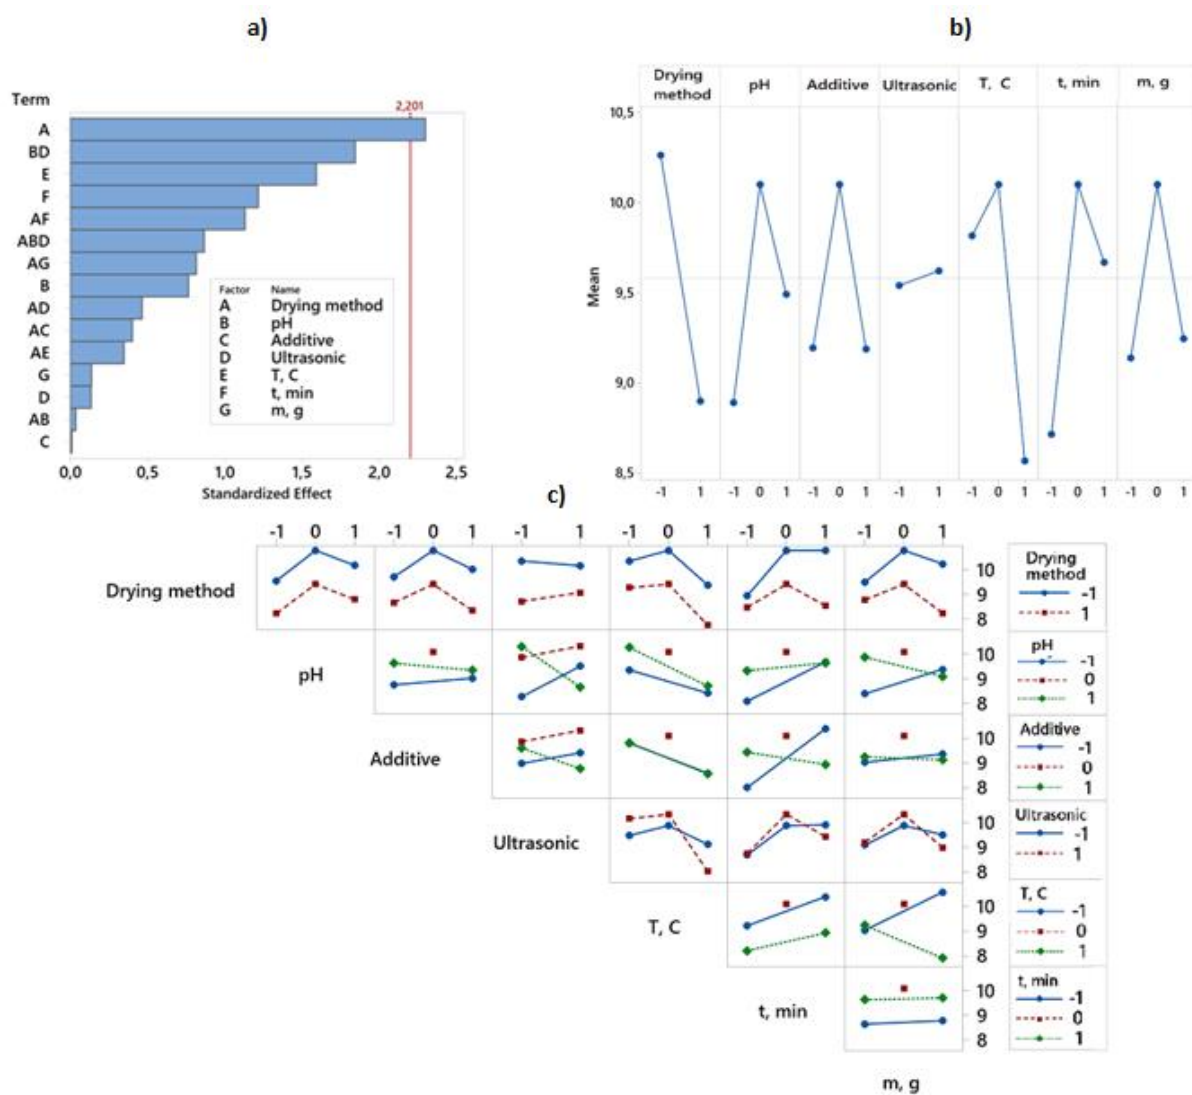

**Figure S1.** Total phenolic content (TPC): (a) Pareto chart of standardized effect (response in g/kg GAE,  $\alpha=0.05$ ); (b) Main effect plot for g/kg GAE; (c) Interaction plot for g/kg GAE.

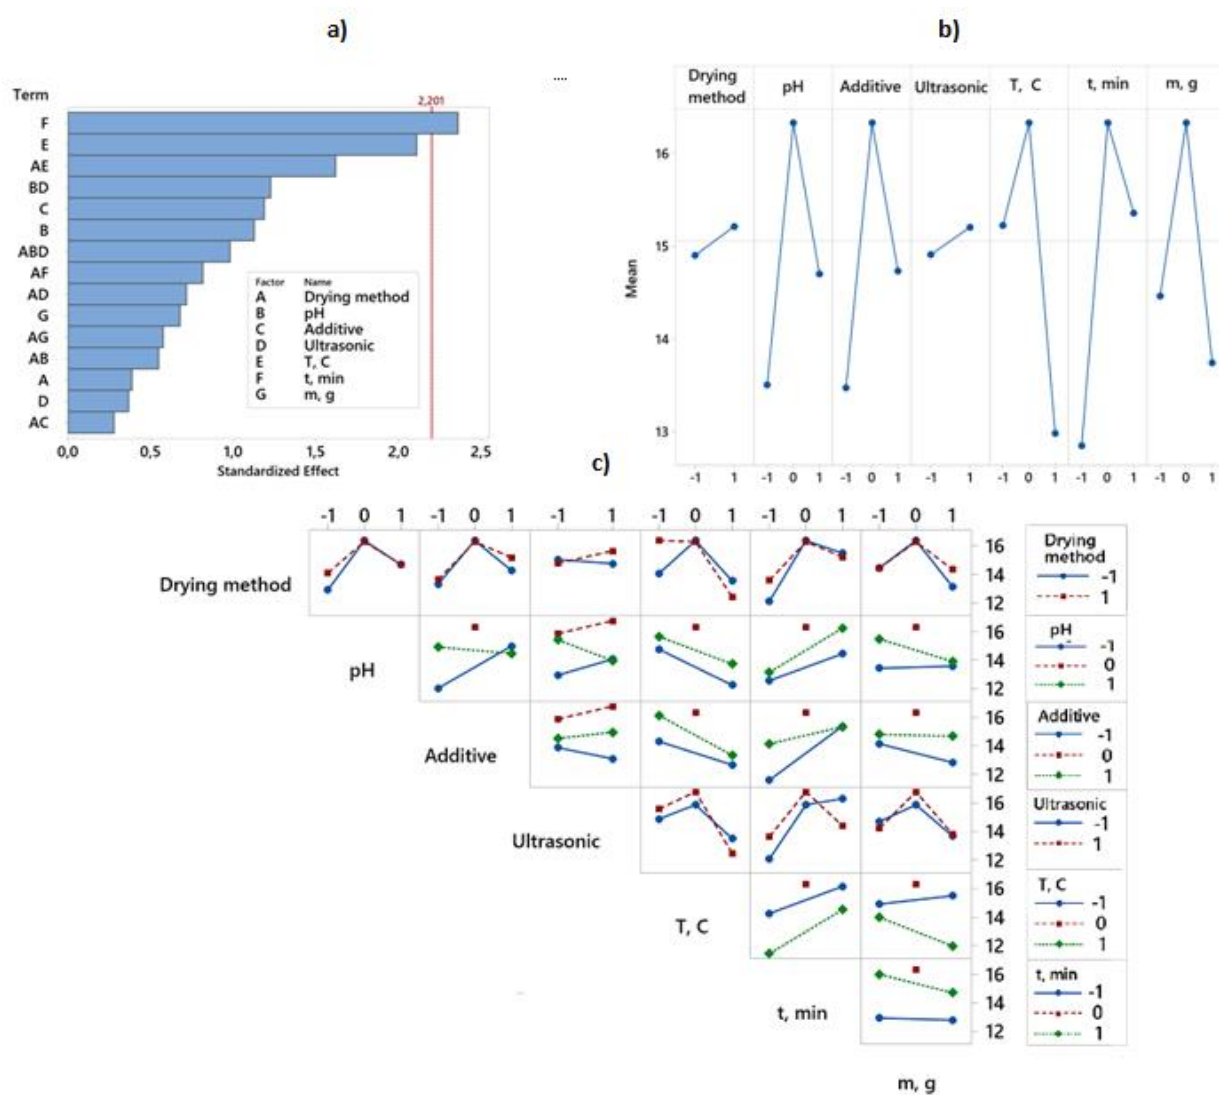

**Figure S2.** FRAP assay: (a) Pareto chart of standardized effect (response in equivalent Trolox g/kg,  $\alpha=0.05$ ); (b) Main effect plot for equivalent Trolox g/kg ; (c) Interaction plot equivalent Trolox g/kg.

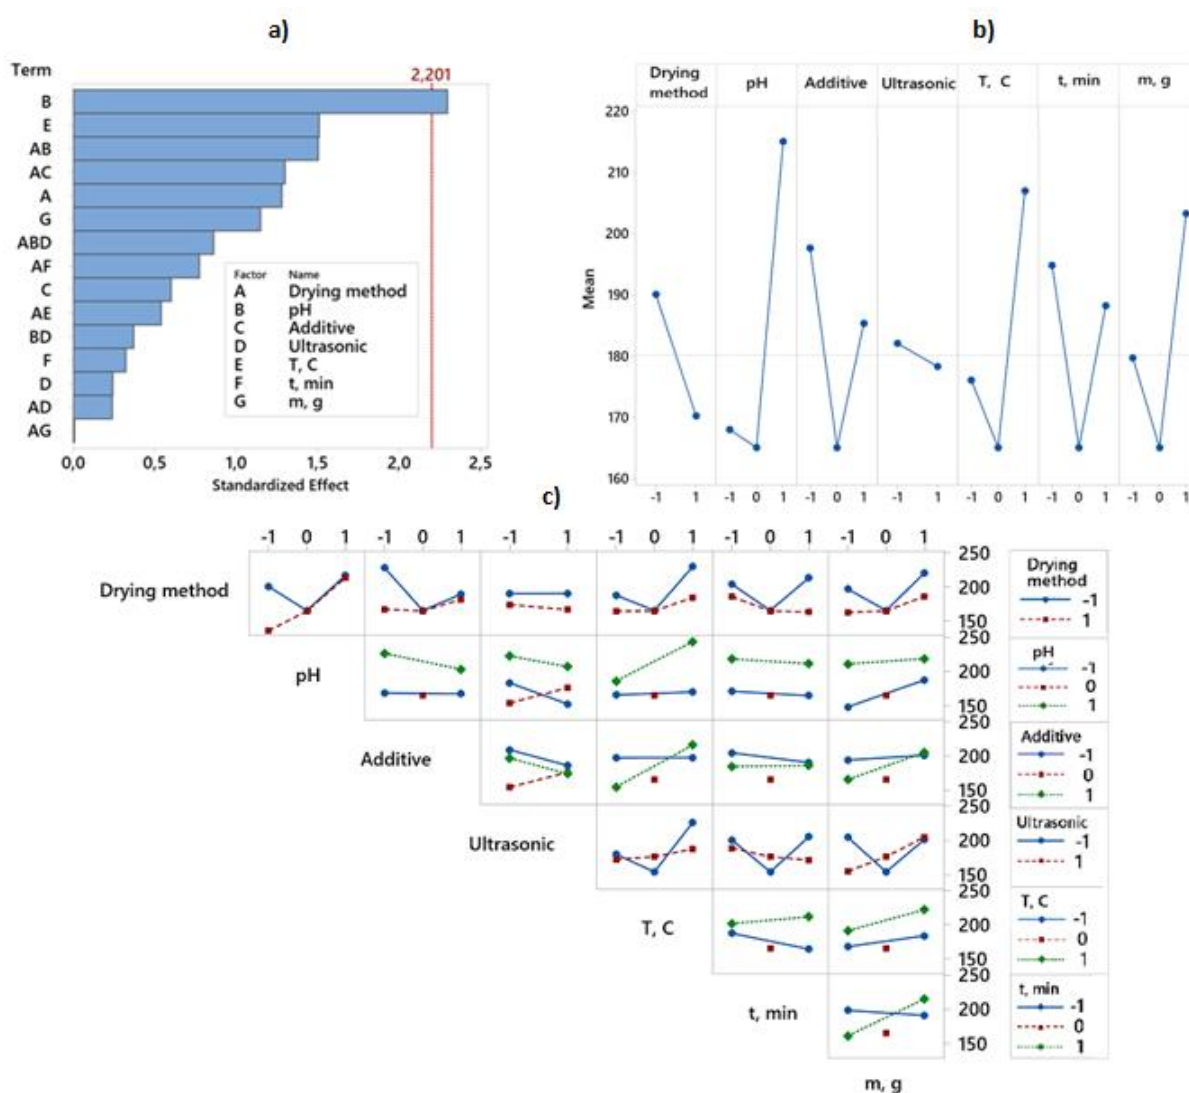

**Figure S3.** Texture analysis / Skin puncture force (g): (a) Pareto chart for standardized effect; (b) Main effect plot; (c) Interaction plot.

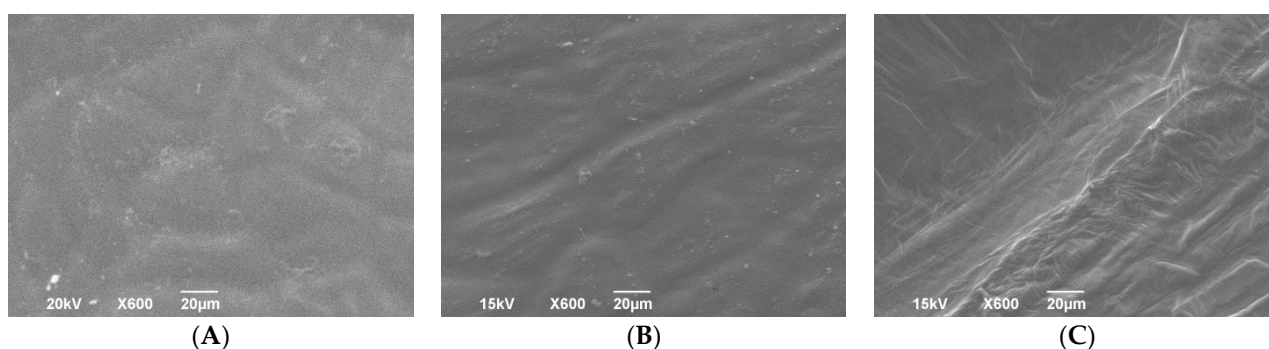

**Figure S4.** SEM micrographs of the dried sweet pepper: (A) - outer surface of sample 3 from FFD, (B) - outer surface of sample 24 from FFD, (C) - inner surface of sample 24 from FFD.

## References

59. Kaur, R.; Kaur, K.; Ahluwalia, P. Effect of Drying Temperatures and Storage on Chemical and Bioactive Attributes of Dried Tomato and Sweet Pepper. *LWT - Food Sci. Technol.* **2020**, *117*, 108604, doi:10.1016/j.lwt.2019.108604.
60. Bechoff, A.; Westby, A.; Menya, G.; Tomlins, K.I. Effect of Pretreatments for Retaining Total Carotenoids in Dried and Stored Orange-Fleshed-Sweet Potato Chips. *J. Food Qual.* **2011**, *34*, 259–267, doi:10.1111/j.1745-4557.2011.00391.x.
